# Supplementary material for: H19 non coding RNA-derived miR-675 enhances tumorigenesis and metastasis of breast cancer cells by downregulating c-Cbl and Cbl-b
Source: PubMed Central journal article supplement (PMC4745721; doi:10.18632/oncotarget.4976), 2015-07-22
Supplement: oncotarget-06-29209-s001.pdf [file oncotarget-06-29209-s001.pdf]

# ***H19* non coding RNA-derived miR-675 enhances tumorigenesis and metastasis of breast cancer cells by downregulating c-Cbl and Cbl-b**

## **SUPPLEMENTARY MATERIAL**

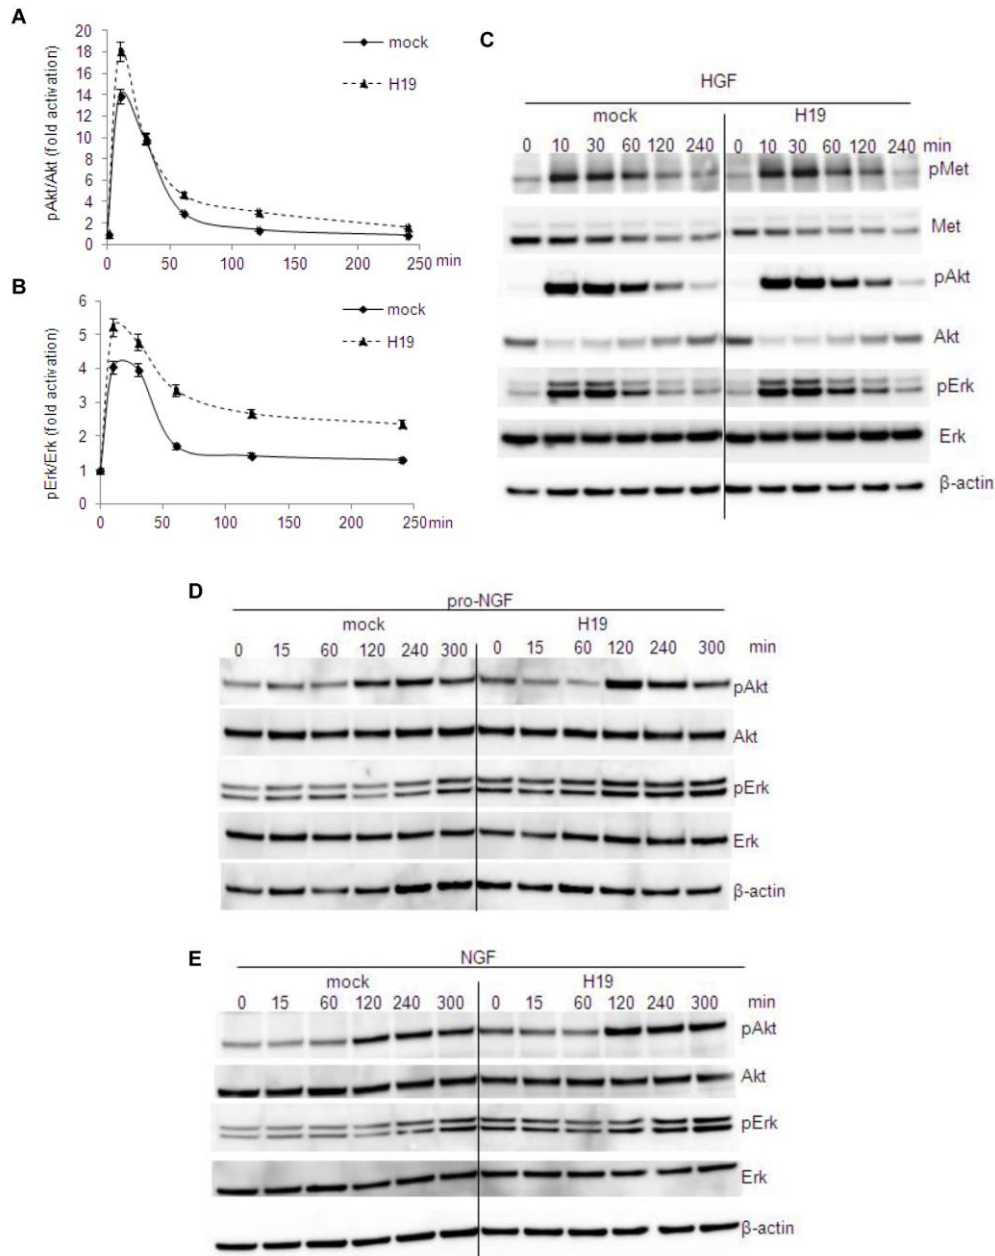

**Supplementary Figure 1. Growth factors induced Akt and Erk phosphorylation in MDA-MB-231 cell stably overexpressing *H19*.** (A, B, C) Control (mock) and *H19* overexpressing cells (H19) were treated with 10 ng/ml HGF. Proteins were extracted at

indicated times and Met, Akt and Erk activation was determined by ALPHAscreen® (**A, B**) and Western blot analysis (**C**). (**D, E**) Cells were treated with 10 ng/ml pro-NGF (**D**) or 100 ng/ml NGF (**E**). Proteins were extracted at indicated time and Akt and Erk activation were determined by Western blot analysis. These experiments were performed three times in triplicate. Data represent one representative experiment. For ALPHAscreen® error bars represent the SEM.

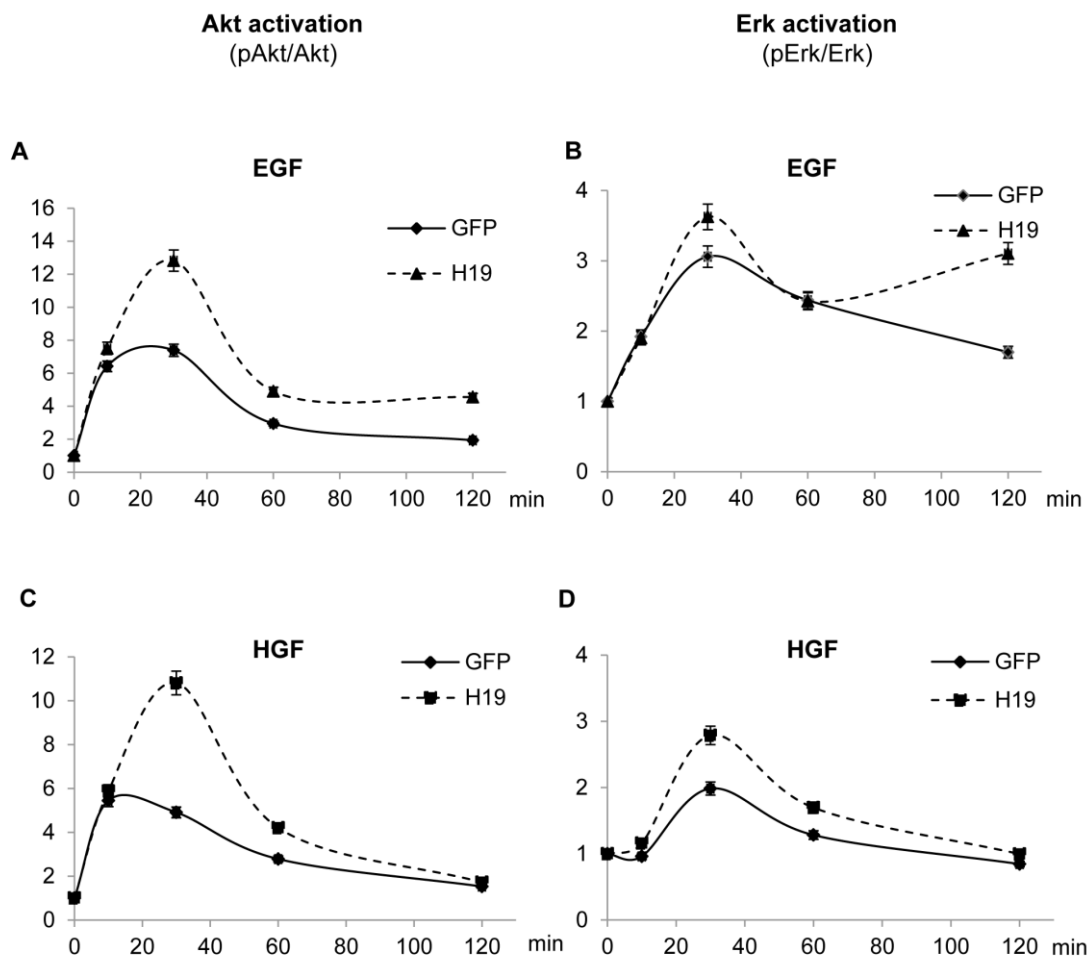

**Supplementary Figure 2. HGF and EGF induced Akt and Erk phosphorylation in MDA-MB-231 cell transiently overexpressing *H19*.** Cells transiently transfected with GFP plasmid or *H19* plasmid for 72 H were treated with 10 ng/ml EGF (A, B) or 10 ng/ml HGF (C, D). Proteins were extracted at indicated times and activation of Akt and Erk was determined by ALPHAscreen®. These experiments were performed three times in triplicate. Data represent one representative experiment and error bars the SEM.

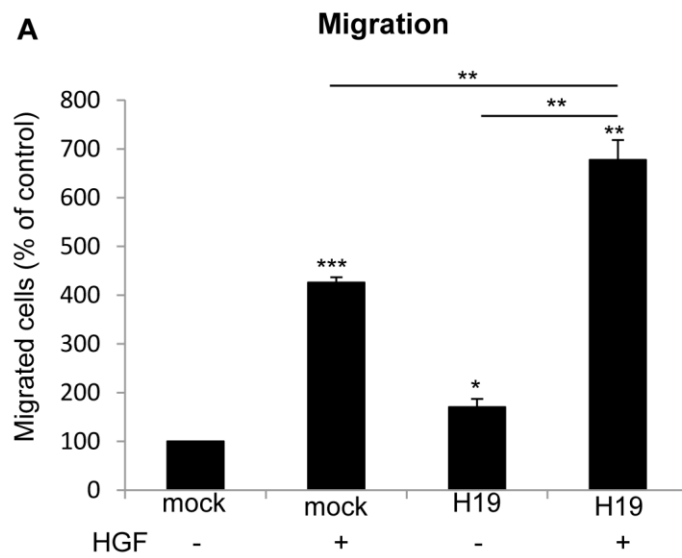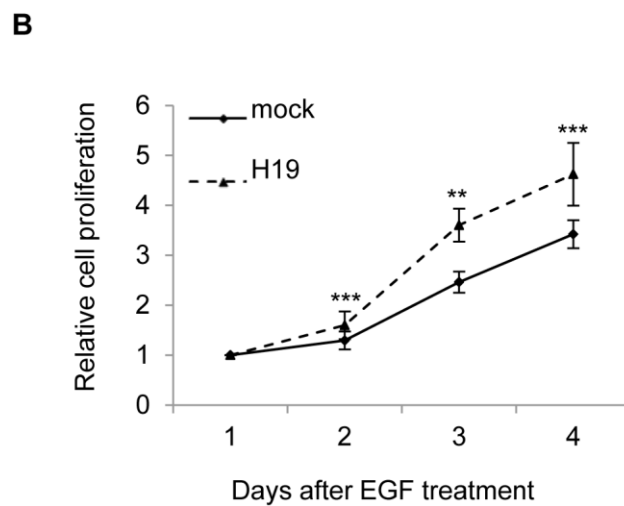

**Supplementary Figure 3. *H19* increased migration and proliferation of breast cancer cells.** (A) Control (mock) or *H19*-overexpressing (H19) MDA-MB-231 cells were cultured in transwells in the presence or absence of 10 ng/ml HGF for 24 h. Migrated cells were then colored with violet crystal and counted. Results are presented as the percentage of non-treated control cells. (B) Control (mock) and *H19*-overexpressing (H19) MCF-7 cells were cultured in the presence of 10 ng/ml EGF. Cell proliferation was determined by MTT test at indicated days. \* $p < 0.005$ ; \*\* $p < 0.005$ ; \*\*\* $p < 0.001$

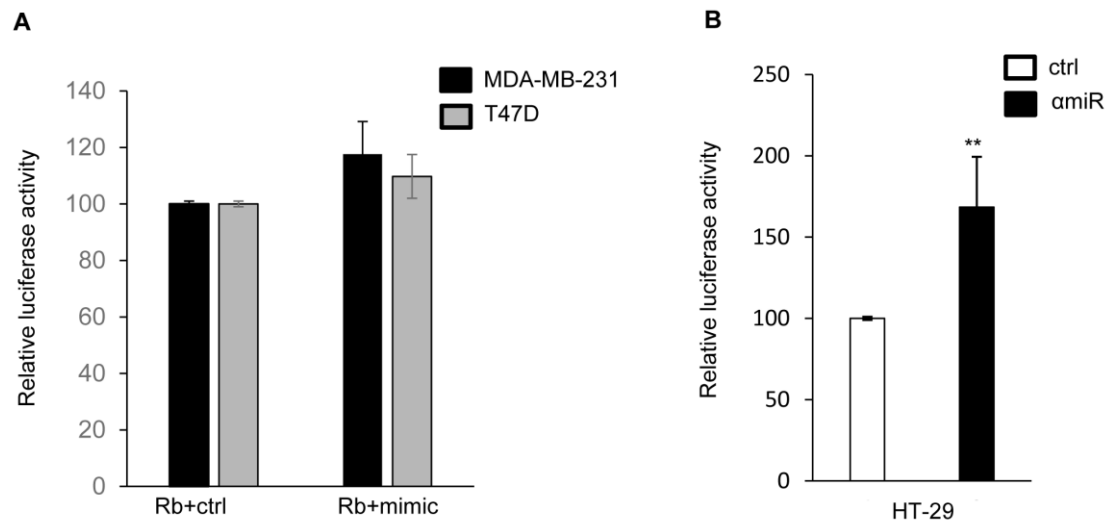

**Supplementary Figure 4. Rb is not regulated by *H19* in breast cancer cells.** The firefly luciferase activity in breast (**A**) and colorectal (**B**) cancer cells after cotransfection with reporter construct and miR-675 mimic or miR-675 inhibitor ( $\alpha$ miR). The luciferase activity was measured by dual-luciferase reporter assay (Promega) and was normalized to Renilla luciferase activity. Plasmids were transfected with mimic or antimir, or their controls in breast and colorectal cancer cells lines (MDA-MB-231, T47D and HT-29). Data represent mean of three independent experiments *versus* their respective controls in percentage and error bar, sem. \*\* $p < 0.01$

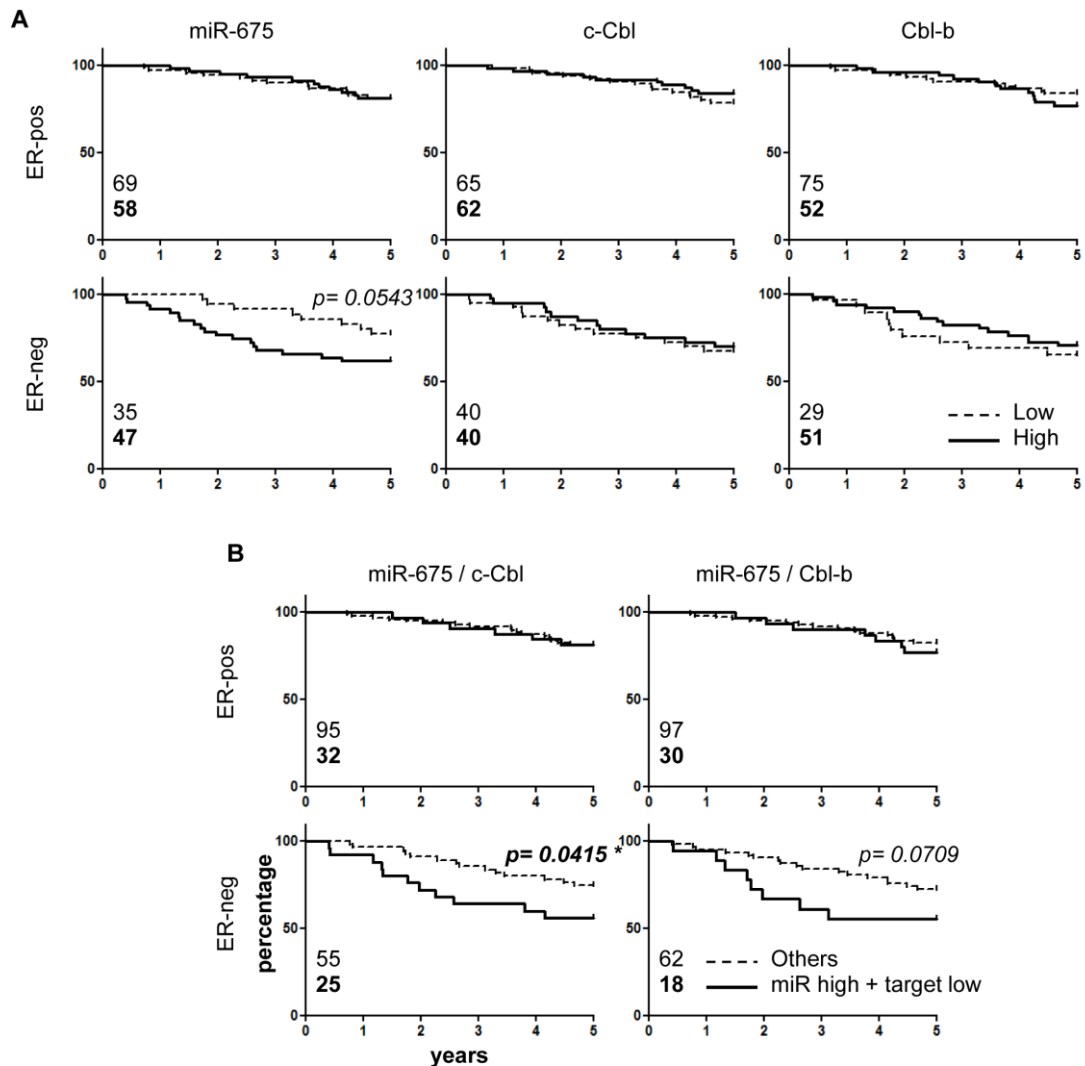

**Supplementary Figure 5. MiR-675 expression is associated to poor free survival.**

microRNA and mRNA expression data were collected from a previously published cohort [36], NCBI accession number GSE22220. We used Graphpad Prism to analyze the data corresponding to miR-675 (probe ILMN\_3167407), c-Cbl (probe 1230102) and Cbl-b (probe 4010563). Tumors were classified as ‘low’ when  $\leq$  to the median and ‘high’ otherwise. (A) Kaplan-Meier analyses were performed for each marker individually after ER stratification. (B) Kaplan-Meier analyses were performed by comparing the patients expressing both a high level of miR-675 and a low level of its putative target (c-Cbl or Cbl-b). Number of patients included is indicated next to each curve. P values were calculated using Grehan-Breslow–Wilcoxon test.

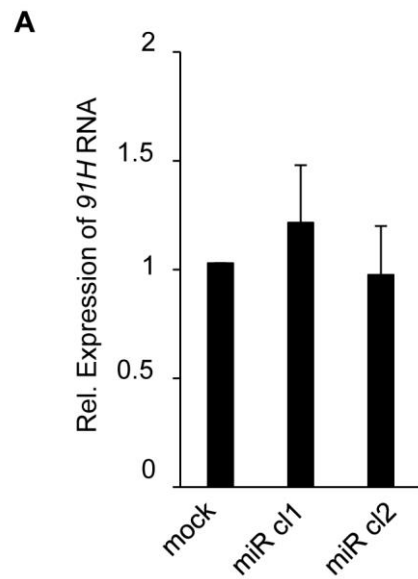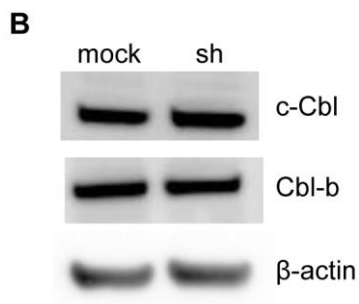

**Supplementary Figure 6. *91H* RNA is not a sponge of miR-675.** (A) Relative expression of *91H* in miR-675 overexpressing cells (miR cl1, miR cl2) determined by qRT-PCR. Data represent mean of three independent experiments and error bar, sem. (B) Western blot analysis of c-Cbl and Cbl-b in breast cancer cells, MDA-MB-231, transfected with *91H* shRNA (sh) compared to control cells (mock).

**Supplementary Table 1.** Antibodies used for western blot analysis.

| Antibody      | Reference  | Origin         |
|---------------|------------|----------------|
| p-Met         | #3135      | Cell signaling |
| Met           | 37-0100    | Invitrogen     |
| p-EGFR        | #1138-1    | Epitomics      |
| EGFR          | AHR5062    | Invitrogen     |
| p-Akt         | 4060S      | Cell signaling |
| Akt           | 2920       | Cell signaling |
| p-Erk         | #9106      | Cell signaling |
| Erk           | C14/sc-154 | Santa Cruz     |
| c-Cbl         | Sc-170     | Santa Cruz     |
| Cbl-b         | Sc-8006    | Santa Cruz     |
| $\beta$ actin | Sc-47778   | Santa Cruz     |

**Supplementary Table 2.** Oligonucleotides used for plasmid construction. Primer used for qRT-PCR. Sequence of *H19* siRNA.

| Primer              | 5' to 3'                        |
|---------------------|---------------------------------|
|                     | <b>cloning</b>                  |
| c-Cbl CDS1 SpeI     | AACTAGTGGCCGGCAACGTGAAGAAGAGCT  |
| c-Cbl CDS1 PmeI     | CGTTTAAACGCTGCCACTCCCTCTAGGATC  |
| c-Cbl CDS2 SpeI     | GACTAGTGAGGGAGTGGCAGCCTGTTGAGG  |
| c-Cbl CDS2 MluI     | ACGCGTCTAGGTAGCTACTAGGGCAGG     |
| c-Cbl 3'UT SpeI     | TACTAGTCACACCATCTCCCTGCTGCAGGT  |
| c-Cbl 3'UT HindIII  | AAGCTTCACCTTCAAATGCACTCAAGA     |
| Mut c-Cbl antisense | TGGACGTTAGGCTGGAAGGCGTCCTTCATG  |
| Mut c-Cbl sense     | CATGAAGGACGCCTTCCAGCCTAACGTCCA  |
| Cbl-b CDS1 SpeI     | CACTAGTGCAAACCTCAATGAATGGCAGAAA |
| Cbl-b CDS1 HindIII  | TAAGCTTCGTCCAAGTCTAGCATCGGCATG  |
| Cbl-b CDS2 SpeI     | CACTAGTATGCTAGACTTGGACGACGATGA  |
| Cbl-b CDS2 HindIII  | CAAGCTTCTATAGATTTAGACGTGGGGATA  |
| Cbl-b 3'UTR SpeI    | TACTAGTCAGCCAGAACTGTAGACACCAAA  |
| Cbl-b 3'UTR HindIII | TAAGCTTATGGAAAACCCCTTACAAAAGG   |
| Mut Cbl-b antisense | AGGACGTTATGGGAGTGGTTTTATCTTGTTT |
| Mut Cbl-b sense     | AAACAAGATAAACCACTCCCATAACGTCCT  |
| H19 FL 5p           | AGCAGGGTGAGGGAGGGGGT            |
| H19 FL 3p           | GTAACAGTGTTTATTGATG             |
| miR-675 HindIII     | AAAGCTTAACGAGGCACTGCGGCCAGGGT   |
| miR-675 BamHI       | AGGATCCTCTGCCAAGCCAGCCCCAGGGGC  |
|                     | <b>RT-qPCR</b>                  |
| RPLP0 sense         | GTGATGTGCAGCTGATCAAGACT         |
| RPLP0 antisense     | GATGACCAGCCCAAAGGAGA            |
| H19 sense           | TACAACCACTGCACTACCTG            |
| H19 antisense       | TGGCCATGAAGATGGAGTCG            |
| c-Cbl sense         | GTGATCCCTGGACAGGAAGA            |



|                       |                      |
|-----------------------|----------------------|
| c-Cbl antisense       | GGTGGTCACACTCTGGACCT |
| Cbl-b sense           | GAAGAAAGCCACAGCCTGAC |
| Cbl-b antisense       | GGATTGGTGGAGGTCTTTCA |
| 91H sense             | GCTTGTAGTAGAGTGCGCC  |
| 91H antisense         | CATCCAGTTGACCGAGCTTG |
|                       | <b>siRNA</b>         |
| siRNA H19 1 sense     | UAAGGUGUUCAGGAAGGCC  |
| siRNA H19 1 antisense | GGCCUCCUGAACACCUUA   |
| siRNA H19 2 sense     | AGCUUCACCUUCCAGAGCC  |
| siRNA H19 2 antisense | GGCUCUGGAAGGUGAAGCU  |
